## Correction

# Correction: An Environmental Data Set for Vector-Borne Disease Modeling and Epidemiology

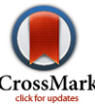

The *PLOS ONE* Staff

In the Methods section, formula M1 is represented incorrectly. The correct formula, provided by the Authors, is shown below.

$$\gamma(d) = \gamma(\infty) \left( 1 - \frac{1}{1 + (d/\lambda)^2} \right)$$

## Reference

1. Chabot-Couture G, Nigmatulina K, Eckhoff P (2014) An Environmental Data Set for Vector-Borne Disease Modeling and Epidemiology. *PLoS ONE* 9(4): e94741. doi:10.1371/journal.pone.0094741

**Citation:** The *PLOS ONE* Staff (2014) Correction: An Environmental Data Set for Vector-Borne Disease Modeling and Epidemiology. *PLoS ONE* 9(7): e103922. doi:10.1371/journal.pone.0103922

**Published:** July 24, 2014

**Copyright:** © 2014 The *PLOS ONE* Staff. This is an open-access article distributed under the terms of the Creative Commons Attribution License, which permits unrestricted use, distribution, and reproduction in any medium, provided the original author and source are credited.
